# Supplementary material for: Sociodemographic inequalities in uranium and other metals in community water systems across the USA, 2006–11: a cross-sectional study
Source: PubMed Central journal article supplement — Lancet Planet Health. Author manuscript; Available in PMC 2022 Apr 25. (PMC9037820; doi:10.1016/s2542-5196(22)00043-2), 2022-04
Supplement: NIHMS1798013-supplement-1.pdf [file NIHMS1798013-supplement-1.pdf]

### Supplementary appendix 1

This translation in Spanish was submitted by the authors and we reproduce it as supplied. It has not been peer reviewed. *The Lancet's* editorial processes have only been applied to the original in English, which should serve as reference for this manuscript.

Supplement to: Ravalli F, Yu Y, Bostick BC, et al. Sociodemographic inequalities in uranium and other metals in community water systems across the USA, 2006–11: a cross-sectional study. *Lancet Planet Health* 2022; **6**: e320–30.

Los autores nos proporcionaron esta traducción al español y la reproducimos tal como nos fue entregada. No la hemos revisado. Los procesos editoriales de *The Lancet* se han aplicado únicamente al original en inglés, que debe servir de referencia para este manuscrito.

## **RESUMEN**

Antecedentes: La Agencia de Protección Ambiental de los Estados Unidos (EPA, por sus siglas en inglés) establece actualmente niveles máximos de contaminantes (MCL, por sus siglas en inglés) para un total de 10 metales/metaloideos en los sistemas públicos de agua potable. Nuestro objetivo fue estimar las concentraciones de metales en los sistemas comunitarios de agua (CWSs, por sus siglas en inglés) en los EE.UU., para establecer si existen desigualdades sociodemográficas o regionales en estas concentraciones, e identificar patrones para estos metales como mezcla.

Métodos: Evaluamos los registros de cumplimiento rutinario para arsénico, bario, berilio, cadmio, cromo, mercurio, selenio, talio y uranio para los años 2006-2011 (2000-2011 para el uranio; periodo basado en los requisitos de monitoreo) obtenidos por la EPA de EE.UU. en apoyo de la Revisión de Seis Años de CWSs. Arsénico, bario, cromo, selenio, y uranio (detectados en >10% registros) se incluyeron en los análisis principales (análisis de subgrupo y mezcla; datos de arsénico reportados previamente). Comparamos la media y los percentiles 75 y 95 de las concentraciones de contaminantes y el porcentaje de los CWS con concentraciones que exceden el MCL en varios subgrupos (región, grupo de condados sociodemográficos, tamaño de la población servida, tipo de fuente de agua, e instituciones penitenciarias). Evaluamos perfiles de patrones de concentración de metales en CWS usando el análisis de cluster jerárquico. Creamos un mapa interactivo en línea y un tablero con la estimación de las concentraciones de metales en CWS para uso en análisis futuros.

Hallazgos: Las concentraciones medias de metales estaban disponibles para un total de 37915 CWS a través de EE.UU. El número total de registros de monitoreo disponible fue de 297000 para arsénico, 165000 para bario, 167000 para cromo, 165000 para selenio, y 128000 para

uranio. El porcentaje de CWS con concentraciones de por encima del MCL fue de 2.6% para arsénico (MCL=10 µg/L; media nacional 1.77 µg/L; n=36798 CWSs), 2.1% para uranio (MCL=30 µg/L, media nacional 4.37 µg/L; n=14503), y menos de 0.1% para los otros metales. El número de registros con detecciones fue más alta para el uranio (63.1%). Los percentiles 75 y 95 para las concentraciones de uranio, cromo, bario, y selenio eran más altas para CWS sirviendo a comunidades *Hispanas*, *Semi-Urbanas*, los CWS que dependen de las aguas subterráneas, y los CWS ubicados en el medio-oeste central. El análisis cluster jerárquico reveló dos tipos de grupos: un grupo con arsénico-uranio-selenio y un grupo con bario-cromo.

Interpretaciones: El uranio es un contaminante poco reconocido en los sistemas públicos de agua potable. Las concentraciones de metales (incluido el uranio) son elevadas en los CWS que sirven a las comunidades *Hispanas*, *Semi-Urbanas* independientemente de la locación/región, resaltando los problemas de justicia ambiental.

Financiación: Oficina del Director, Institutos Nacionales de Salud (OD, por sus siglas en inglés); Institutos Nacionales de las Ciencias de la Salud Ambiental (NIEHS, por sus siglas en inglés); Instituto Nacional de Investigación Dental y Cráneo facial (NIDCR, por sus siglas en inglés).
