# Supplementary material for: Sociodemographic inequalities in uranium and other metals in community water systems across the USA, 2006–11: a cross-sectional study
Source: PubMed Central journal article supplement — Lancet Planet Health. Author manuscript; Available in PMC 2022 Apr 25. (PMC9037820; doi:10.1016/s2542-5196(22)00043-2), 2022-04
Supplement: NIHMS1798013-supplement-3.pdf [file NIHMS1798013-supplement-3.pdf]

# THE LANCET

## Planetary Health

### Supplementary appendix 3

This appendix formed part of the original submission and has been peer reviewed.  
We post it as supplied by the authors.

Supplement to: Ravalli F, Yu Y, Bostick BC, et al. Sociodemographic inequalities in uranium and other metals in community water systems across the USA, 2006–11: a cross-sectional study. *Lancet Planet Health* 2022; **6**: e320–30.
